# Supplementary material for: Regulation of centrin self-assembly investigated by fluorescence resonance light scattering
Source: Royal Society of Chemistry journal article supplement (doi:10.1039/c6ra26865j), 2017-01-01
Supplement: c6ra26865j1.pdf [file c6ra26865j1.pdf]

**Regulation centrin self-assembly investigated by fluorescence  
resonance light scattering**

**Yaqin Zhao XiaojuanGuo and Binsheng Yang\***

*Institute of Molecular Science, Key Laboratory of Chemical Biology and Molecular Engineering  
of Ministry of Education, Key Laboratory of Materials for Energy Conversion and Storage of*

*Shanxi Province, Shanxi University, Taiyuan 030006, China*

\*To whom correspondence should be addressed. Tel: +86 351 7016358. Fax: +86 351 7016358. E-mail: [yangbs@sxu.edu.cn](mailto:yangbs@sxu.edu.cn)

Fig. S1 A: Cross-linking analysis of EoCenp. Lane 1: EoCenp; Lane 2: EoCenp + 0.1% glutaraldehyde. B: The proportions of EoCenp monomer and aggregations compared with the total protein in figure 2.4. a: EoCenp monomer; b: EoCenp aggregations.

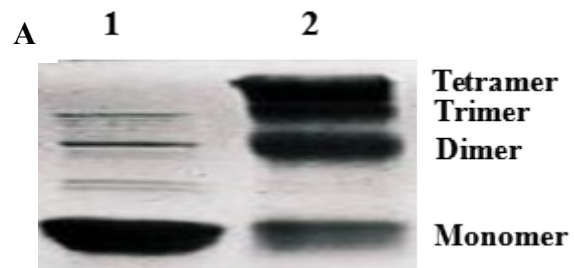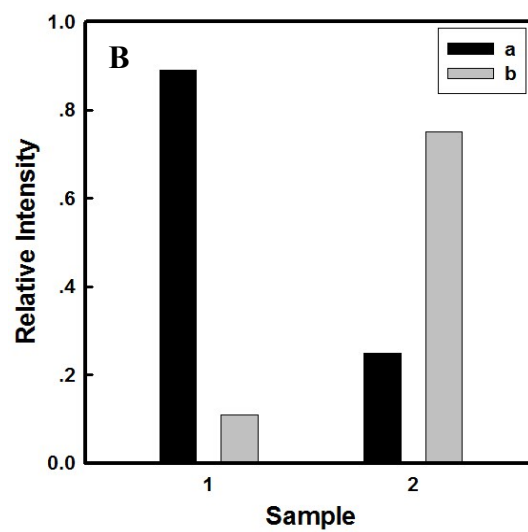

Fig. S2. Titration curves for different concentrations of EoCenp (A) and EoCen (B) with  $Tb^{3+}$  by measuring the RLS intensity at 370 nm in 10 mM Hepes, pH 7.4, 25 °C. The concentration of protein is  $1.0 \times 10^{-6}$  (a),  $5.0 \times 10^{-6}$  (b),  $8.0 \times 10^{-6}$  M (c), respectively. The width of excitation and emission was 2.5 nm.

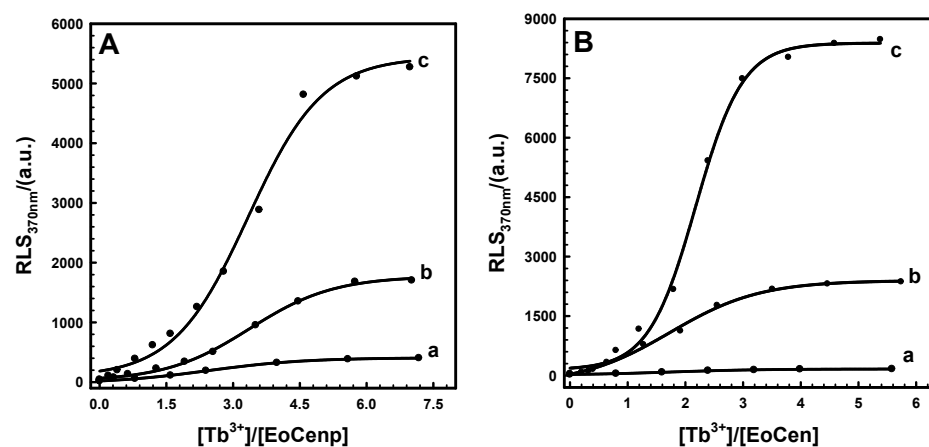

Fig. S3 The effect of monovalent cations on the aggregation of EoCen (a) and EoCenp (b) in 10 mM Hepes, pH 7.4, 25 °C. A: KCl; B: NaCl; C: LiCl. The concentrations of protein were 2.5  $\mu$ M.

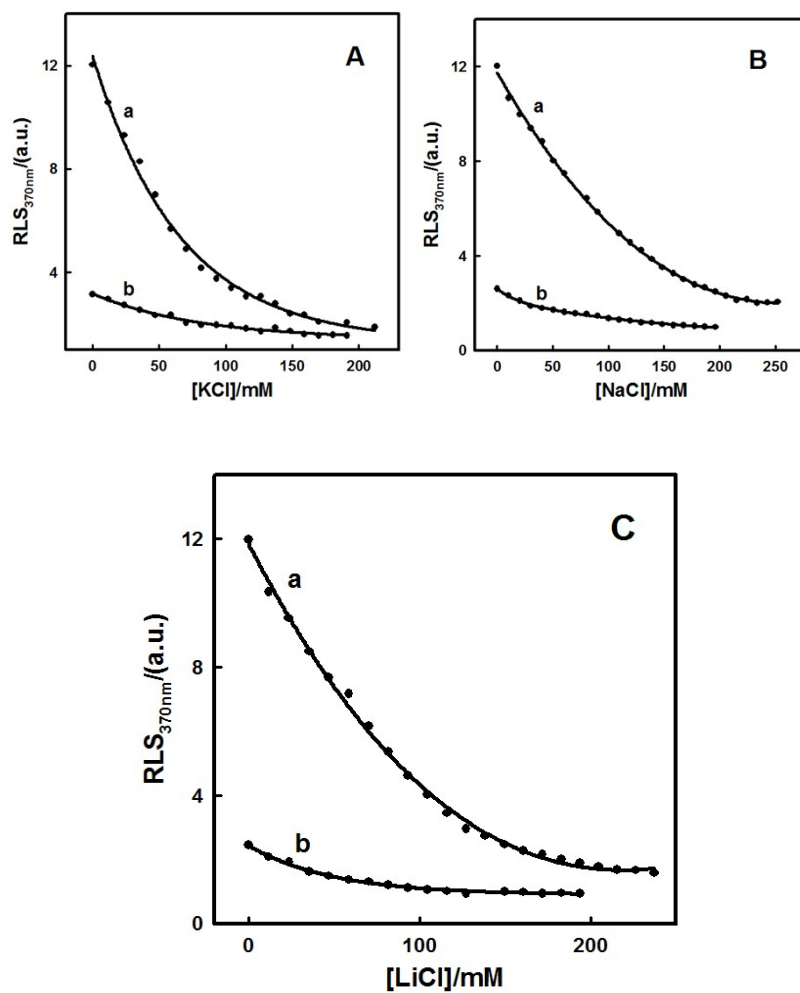

Fig. S4 RLS titration curves of EoCen (red) and EoCenp (black) with the addition of  $Tb^{3+}$  in the presence of different concentrations of NaCl. The concentration of NaCl was 150 mM.

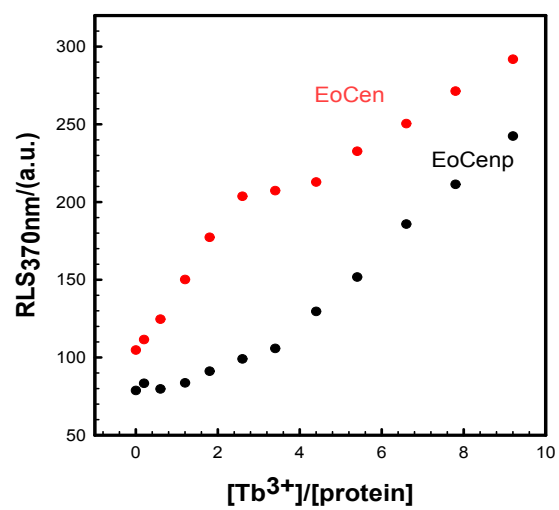

Table S1 Fluorescence lifetime values of EoCen in various states.

|                                     | $\tau_1$ (%)       | $\tau_2$ (%)       | $\tau_3$ (%)       |
|-------------------------------------|--------------------|--------------------|--------------------|
| apoEoCen                            | 1.40±0.03 (45.67%) | 3.09±0.03 (54.33%) |                    |
| TbEoCen                             | 1.33±0.03 (47.51%) | 3.02±0.03 (52.49%) |                    |
| Tb <sub>2</sub> EoCen               | 0.96±0.02 (46.22%) | 2.85±0.02 (57.39%) |                    |
| apoEoCenp                           | 1.28±0.02 (58.65%) | 3.42±0.03 (41.35%) |                    |
| TbEoCenp                            | 0.44±0.05 (31.94%) | 1.76±0.09 (45.78%) | 3.82±0.15 (22.28%) |
| Tb <sub>2</sub> TbEoCenp            | 0.38±0.03 (50.66%) | 1.76±0.08 (34.88%) | 3.97±0.17 (14.45%) |
| apoC-EoCen                          | 1.86±0.05 (46.77%) | 3.52±0.06 (53.23%) |                    |
| TbC-EoCen                           | 1.69±0.05 (40.94%) | 3.51±0.04 (59.06%) |                    |
| Tb <sub>2</sub> TbC-EoCen           | 0.33±0.02 (46.22%) | 2.07±0.13 (31.70%) | 3.92±0.18 (22.09%) |
| apoC-EoCenp                         | 1.74±0.04 (51.50%) | 3.69±0.05 (48.50%) |                    |
| TbC-EoCenp                          | 0.31±0.05 (40.94%) | 1.73±0.09 (38.69%) | 3.63±0.09 (35.33%) |
| Tb <sub>2</sub> TbC-EoCenp          | 0.50±0.01 (55.90%) | 3.05±0.02 (44.10%) |                    |
| apo aggregated EoCen                | 0.97±0.02 (65.49%) | 2.41±0.04 (34.51%) |                    |
| aggregated Tb <sub>2</sub> -EoCen   | 0.69±0.01 (72.83%) | 2.21±0.03 (27.17%) |                    |
| apo aggregated C-EoCen              | 0.98±0.03 (47.44%) | 2.48±0.03 (52.56%) |                    |
| aggregated Tb-C-EoCen               | 0.67±0.02 (59.90%) | 2.20±0.02 (40.10%) |                    |
| aggregated Tb <sub>2</sub> -C-EoCen | 0.26±0.01 (92.98%) | 1.86±0.05 (7.02%)  |                    |

Table S2. Fluorescent lifetime values of Tyr in solvents with different polarity.

| solvents                      | $\tau$    |
|-------------------------------|-----------|
| Tyr+H <sub>2</sub> O (pH=7.0) | 3.41±0.01 |
| Tyr+DMSO                      | 2.0±0.01  |
| Tyr+DMF                       | 0.67±0.00 |
| Tyr+pyridine                  | 0.27±0.00 |

Table S3. The first order reaction rate constants of Tb<sup>3+</sup>-induced self-assembly of EoCenp and EoCen at different concentrations of Tb<sup>3+</sup>.

| [Tb <sup>3+</sup> ]/[protein] | 0:1 | 1:1                     | 2:1                     | 4:1                     |
|-------------------------------|-----|-------------------------|-------------------------|-------------------------|
| k (EoCenp) (s <sup>-1</sup> ) | 0   | 1.55 × 10 <sup>-4</sup> | 1.86 × 10 <sup>-3</sup> | 2.18 × 10 <sup>-3</sup> |
| k (EoCen) (s <sup>-1</sup> )  | 0   | 2.31 × 10 <sup>-3</sup> | 5.58 × 10 <sup>-3</sup> | 3.0 × 10 <sup>-2</sup>  |

Table S4. The reaction rate constants of EoCenp and EoCen self-assembly induced by Tb<sup>3+</sup> with different concentrations of KCl.

| KCl/(mM)                      | 20    | 40    | 60    | 80    | 100                     | 120                      | 150                     |
|-------------------------------|-------|-------|-------|-------|-------------------------|--------------------------|-------------------------|
| k (EoCenp) (s <sup>-1</sup> ) | 0.064 | 0.067 | 0.048 | 0.040 | 0.043                   | 0.046                    | 0.029                   |
|                               | 0.004 | 0.004 | 0.002 | 0.002 | 0.003                   | 0.003                    | 0.001                   |
| k (EoCen) (s <sup>-1</sup> )  | 0.070 | 0.052 | 0.039 | 0.015 | 3.15 × 10 <sup>-3</sup> | 2.015 × 10 <sup>-3</sup> | 3.62 × 10 <sup>-7</sup> |
|                               | 0.005 | 0.004 | 0.003 | 0.001 | -                       | -                        | -                       |
